# Supplementary material
Source: publisher figshare collection journal article supplement (https://tandf.figshare.com/articles/dataset/_/7145825)
Supplement: Supplementary file 4 [file 3]

$f = 0.9$

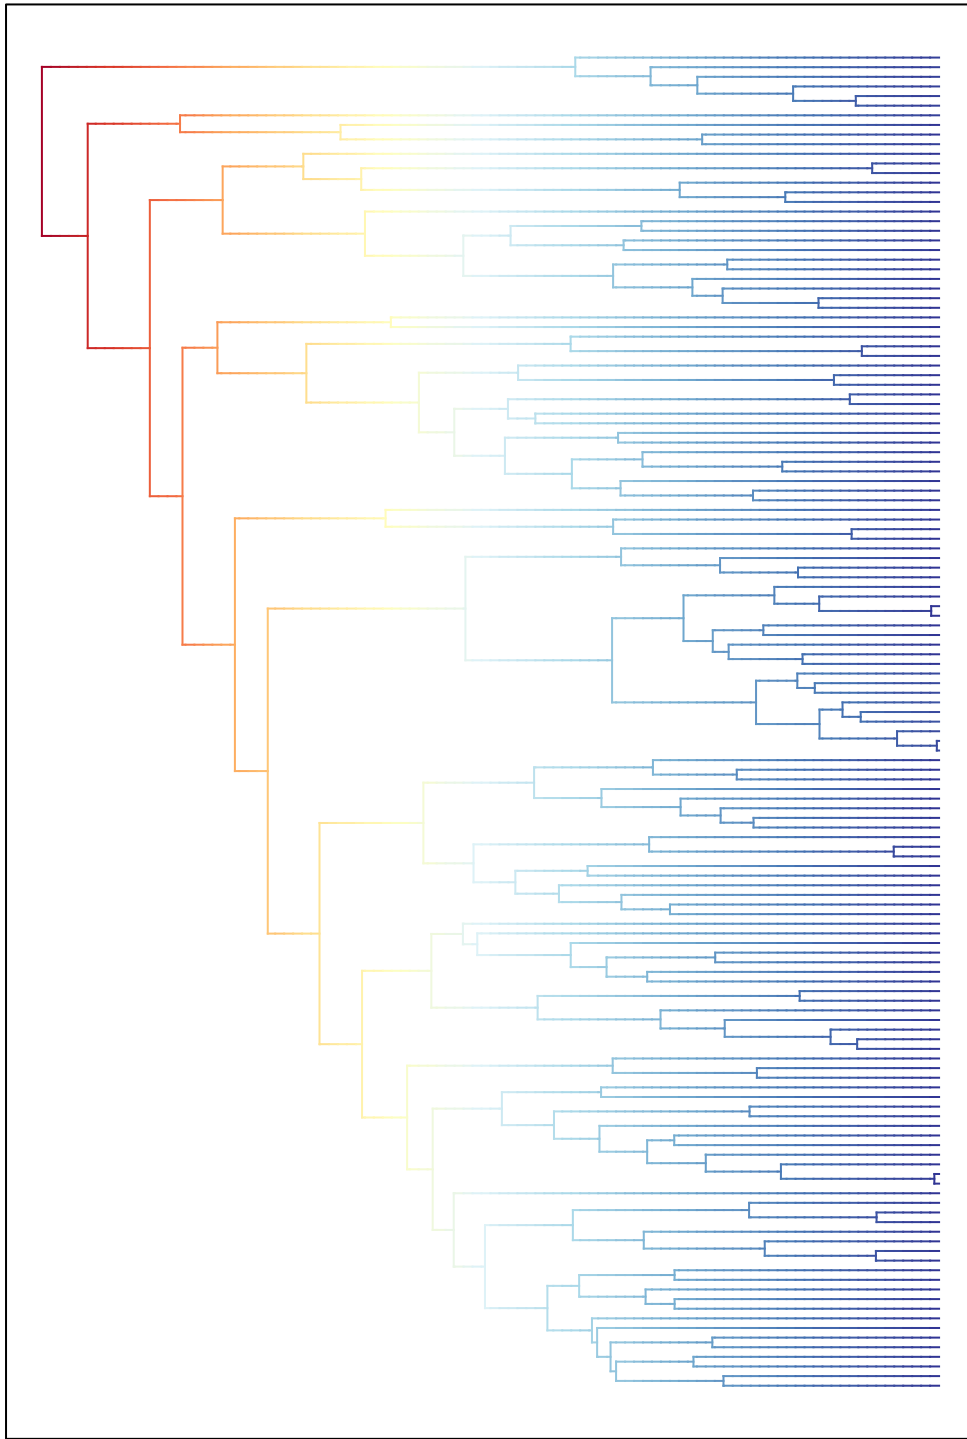

$f = 0.065$

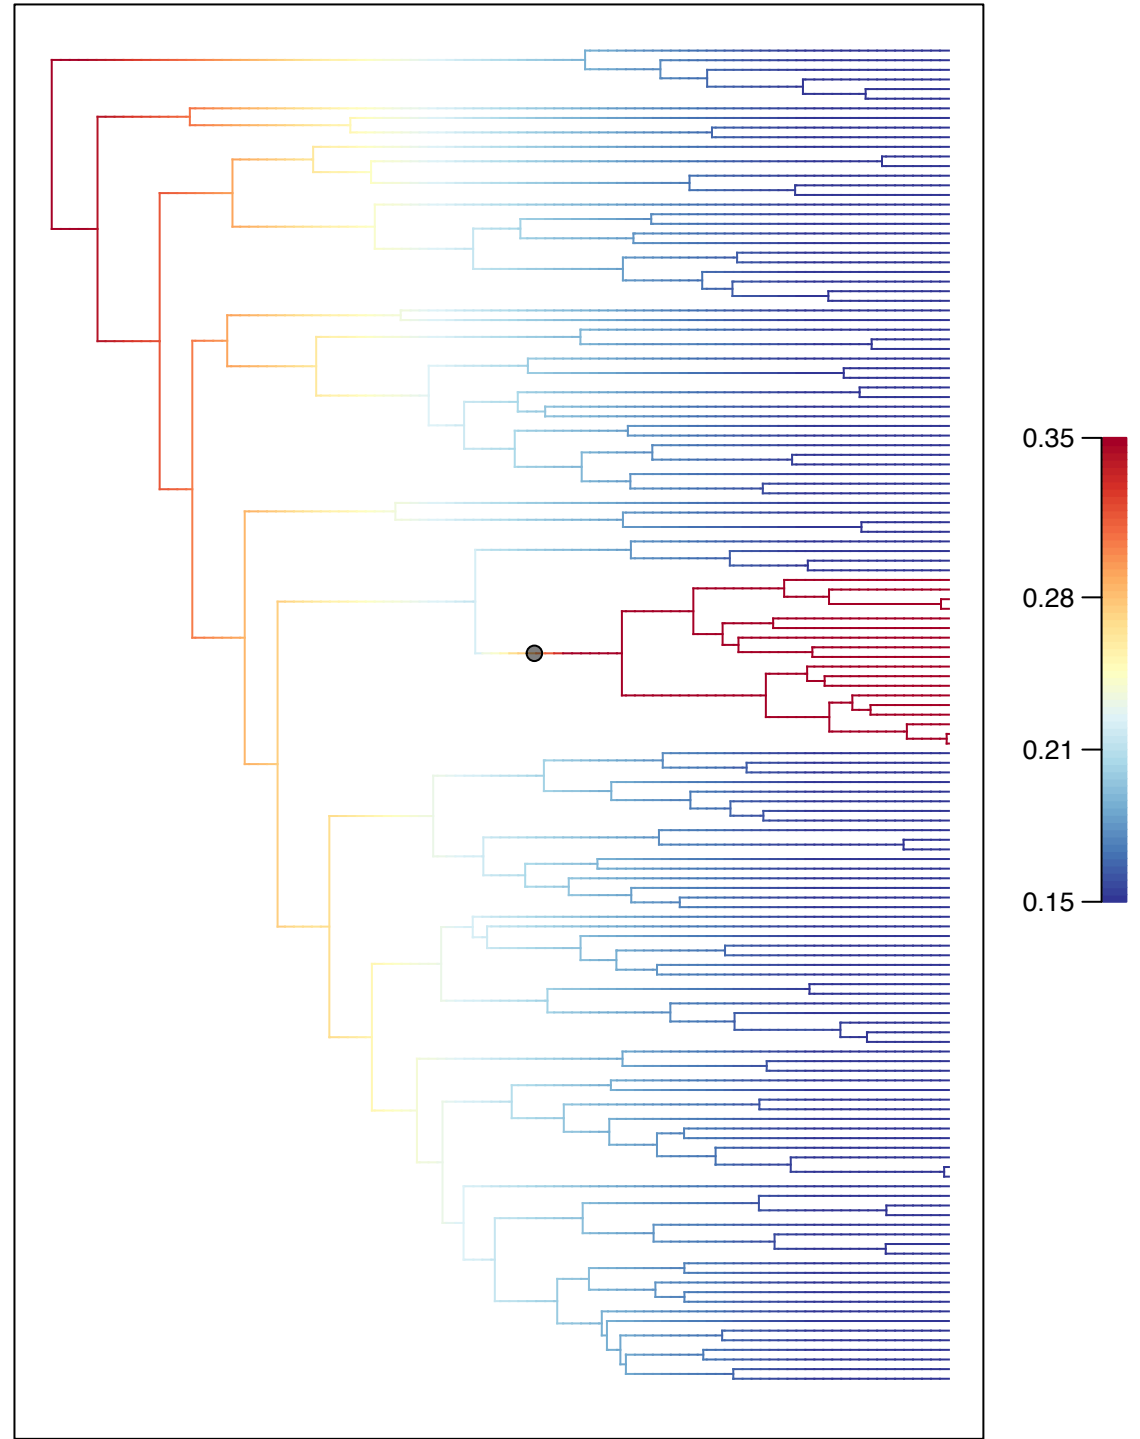

Figure S4. 95% credible set of macroevolutionary shift configurations for *Pristimantis*. Posterior probability of each configuration is above the tree. Colours correspond to speciation rates.
