# Supplementary material
Source: publisher figshare collection journal article supplement (https://tandf.figshare.com/articles/dataset/_/7145825)
Supplement: Supplementary file 5 [file 3]

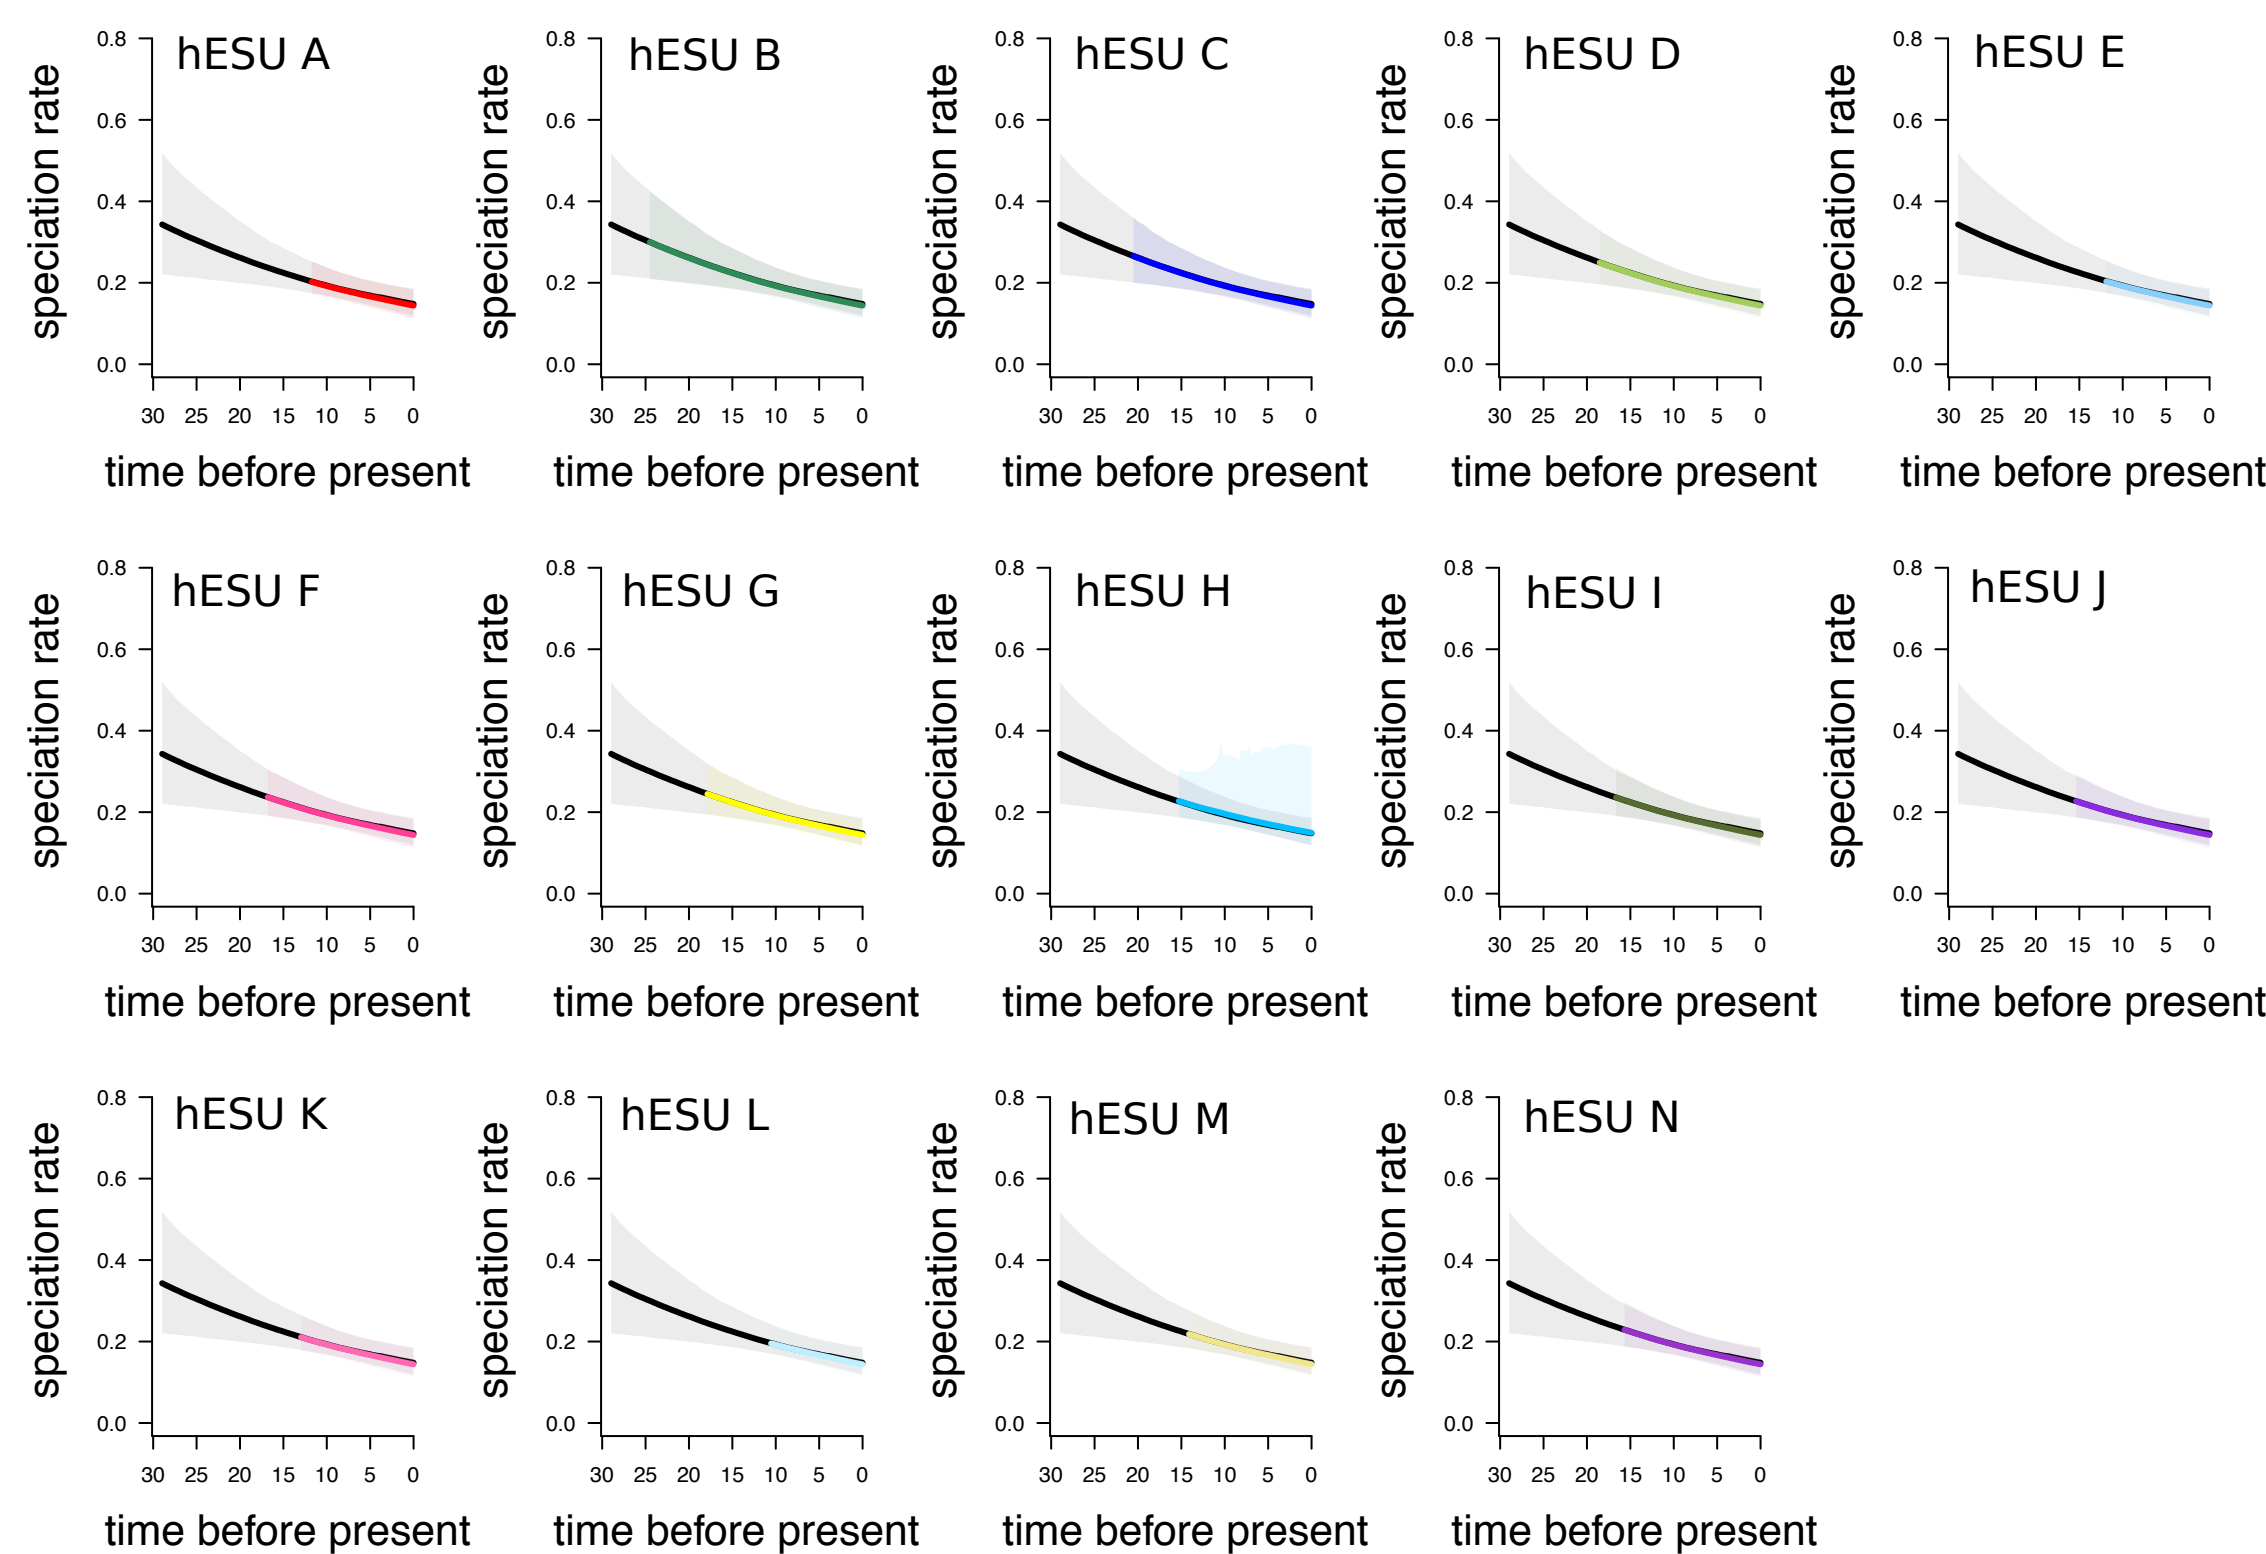

Figure S4. Rate through time plot for each hESU. The black line represent speciation rate for *Pristimantis*. Shaded areas represent 95% confidence intervals.
